# Supplementary material for: Topotactic reduction as a synthetic route for the preparation of low-dimensional Mn(II) oxide phases: The structure and magnetism of LaAMnO4-x (A = Sr, Ba)
Source: Royal Society of Chemistry journal article supplement (doi:10.1039/b923966a), 2010-01-01
Supplement: b923966a.pdf [file b923966a.pdf]

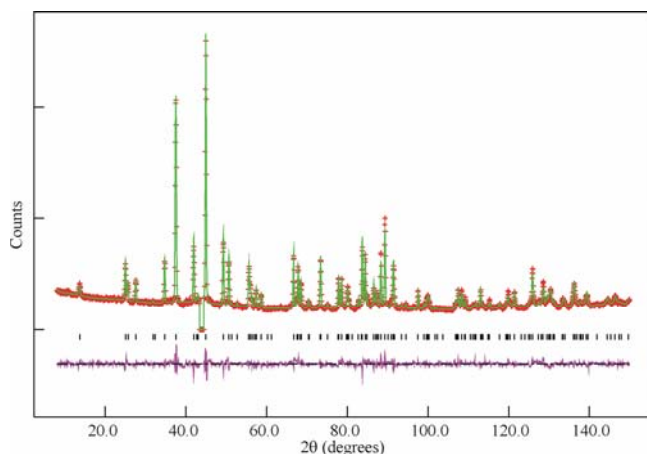

**Figure S1:** Observed, calculated and difference plots from the structural refinement of LaSrMnO<sub>3.67(3)</sub> (sample SR1) against neutron powder diffraction data collected at room temperature. The excluded region removes the contribution from the vanadium sample holder.

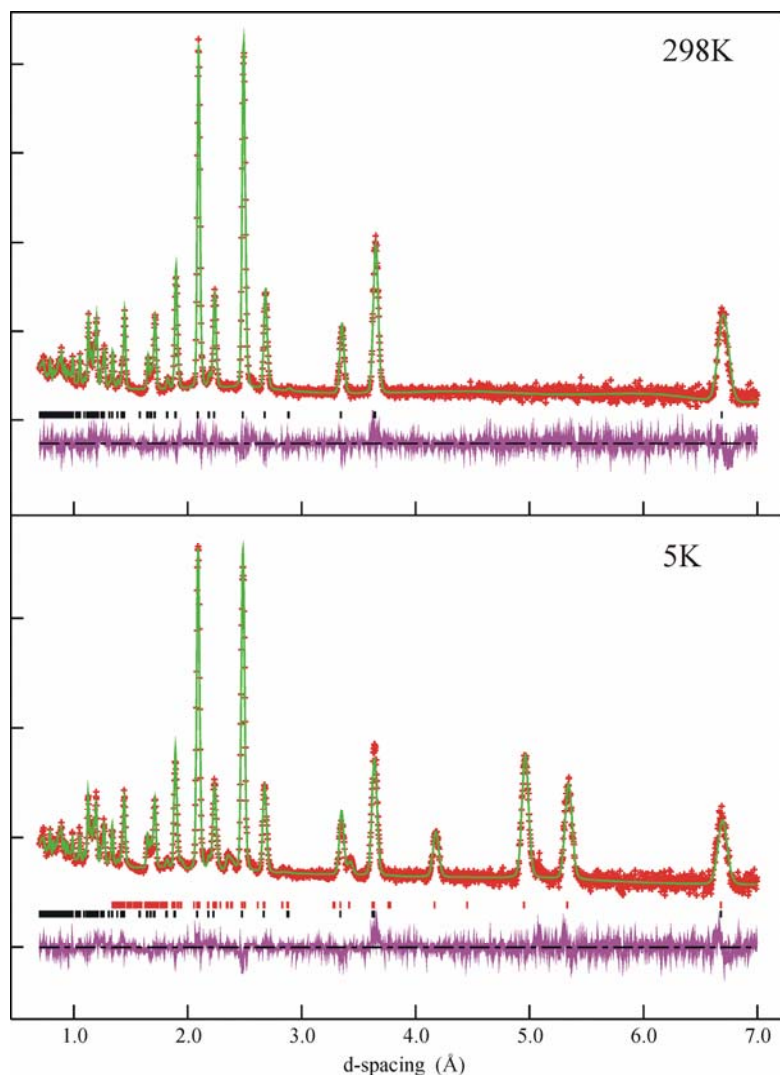

**Figure S2:** Observed, calculated and difference plots from the structural and magnetic refinements of LaSrMnO<sub>3.5</sub> (sample SR2) against powder neutron diffraction data collected at 298K and 5K.

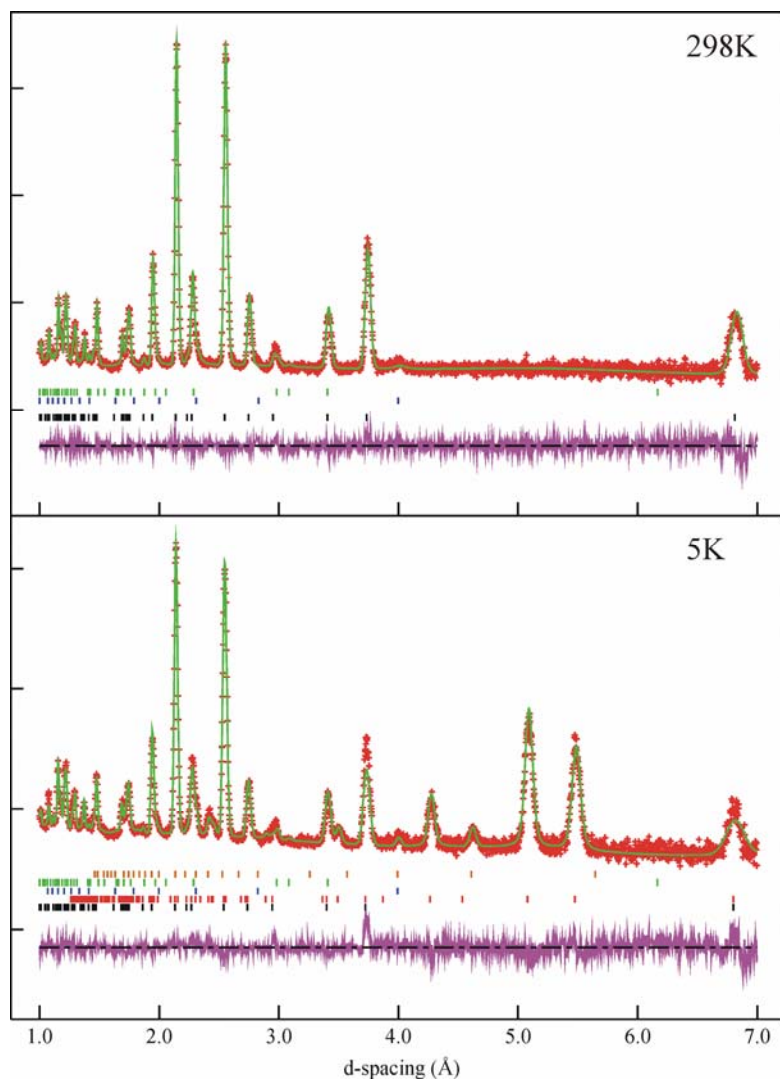

**Figure S3:** Observed, calculated and difference plots from the multiphase structural and magnetic refinements of  $\text{LaBaMnO}_{3.5}$  (sample BA1) against powder neutron diffraction data collected at 298K and 5K.
